# Supplementary material for: AFB1 Triggers Lipid Metabolism Disorders through the PI3K/Akt Pathway and Mediates Apoptosis Leading to Hepatotoxicity
Source: MDPI journal article supplement (doi:10.3390/foods13010163), 2024-01-03
Supplement: s1 [file s1]

## Supplementary Materials

### Catalog

|                  |                                                                                                                                    |
|------------------|------------------------------------------------------------------------------------------------------------------------------------|
| <b>Test S1</b>   | Experimental methods for lipidomics analysis                                                                                       |
| <b>Figure S1</b> | Survival analysis of core genes in the TCGA-LIHC cohort (A) and their expression in GEO datasets (B)                               |
| <b>Figure S2</b> | The dose–response curves of cell viability caused by AFB1 in HepG2 cells as determined by CCK-8 assays                             |
| <b>Figure S3</b> | Chromatographic lipid profiles of HepG2 cells in positive and negative ion modes                                                   |
| <b>Figure S4</b> | Evaluation of QC samples in positive and negative mode                                                                             |
| <b>Figure S5</b> | The evaluations of the non-targeted lipidomics OPLS-DA models in the comparison between the control group and AFB1 exposure groups |
| <b>Table S1</b>  | Detailed information of differential expression lipids                                                                             |

#### Test S1. Experimental methods for lipidomics analysis.

Frozen cell samples were thawed on ice and broken by an ultrasonic cell pulverizer. The extraction process of intracellular lipids was performed following the traditional Folch method with minor modifications. Briefly, 300  $\mu$ L methanol–dichloromethane (2:1, v/v) was added to 100  $\mu$ L cytosol. The mixture was vortexed for 30 s and centrifugated at 10000 r min<sup>−1</sup> for 5 min. Afterward, the supernatant solution was transferred to a glass tube. Subsequently, the same extraction process was repeated to increase the extraction efficiency. The extracts were combined in a glass tube. Next, the extracts were evaporated to dryness under nitrogen and finally resuspended in 0.5 mL methanol for lipid analysis. Equal quantities of analytical samples were blended for the preparation of quality control (QC) samples to evaluate the stability of the instrument and determine data reliability.

Lipidome profiling was carried out using LC-IM-MS instrumentation (ACQUITY UPLC with a SYNAPT G2-XS IM-Quadrupole Time of Flight (QTOF) Mass Spectrometer (Waters Corporation, Milford, MA, USA)). Data were collected by scanning in the resolution mode and MSE mode from 50 to 1200 m/z with a scan duration of 0.8s. Two channels of MS data were recorded in the MSE mode, one with a low collision energy (4 eV) and the other with a collision energy ramp (15–50 eV) to obtain fragmentation data. For accurate mass determination, leucine enkephalin was utilized as the lock mass (reference mass) and the device was calibrated with sodium formate. Ion mobility spectroscopy was carried out using nitrogen drift gas and calibrated with Major Mix infusion. The source parameters were as follows: ion source type, ESI source; scan mode, positive (+)/negative (−) ion mode; capillary voltage, 2.5 kV (+)/2.0 kV (−); source temperature, 100°C; and sampling cone voltage, 40 V. The autosampler tray was set to 8 °C. Lipid extracts (2  $\mu$ L injection volume) were separated by a CSH C18 column (Waters 2.1  $\times$ 150 mm, 1.7  $\mu$ m), kept at 50 °C. A binary solvent system of mobile phase A (acetonitrile: water (6:4, v/v)) and mobile phase B (isopropanol: acetonitrile (9:1, v/v)) was used, with both phases containing 10 mM ammonium formate and 0.1% formic acid. Separation was carried out with a flow rate of 0.28 mL/min, for a total of 32 min, with the following gradient: 0 min, 60% A; 4min, 55% A; 4.1 min, 50% A; 12 min, 44% A; 12.1 min, 30% A; and 26 min, 1% A; followed by 6 minutes of re-equilibration to 60% A.

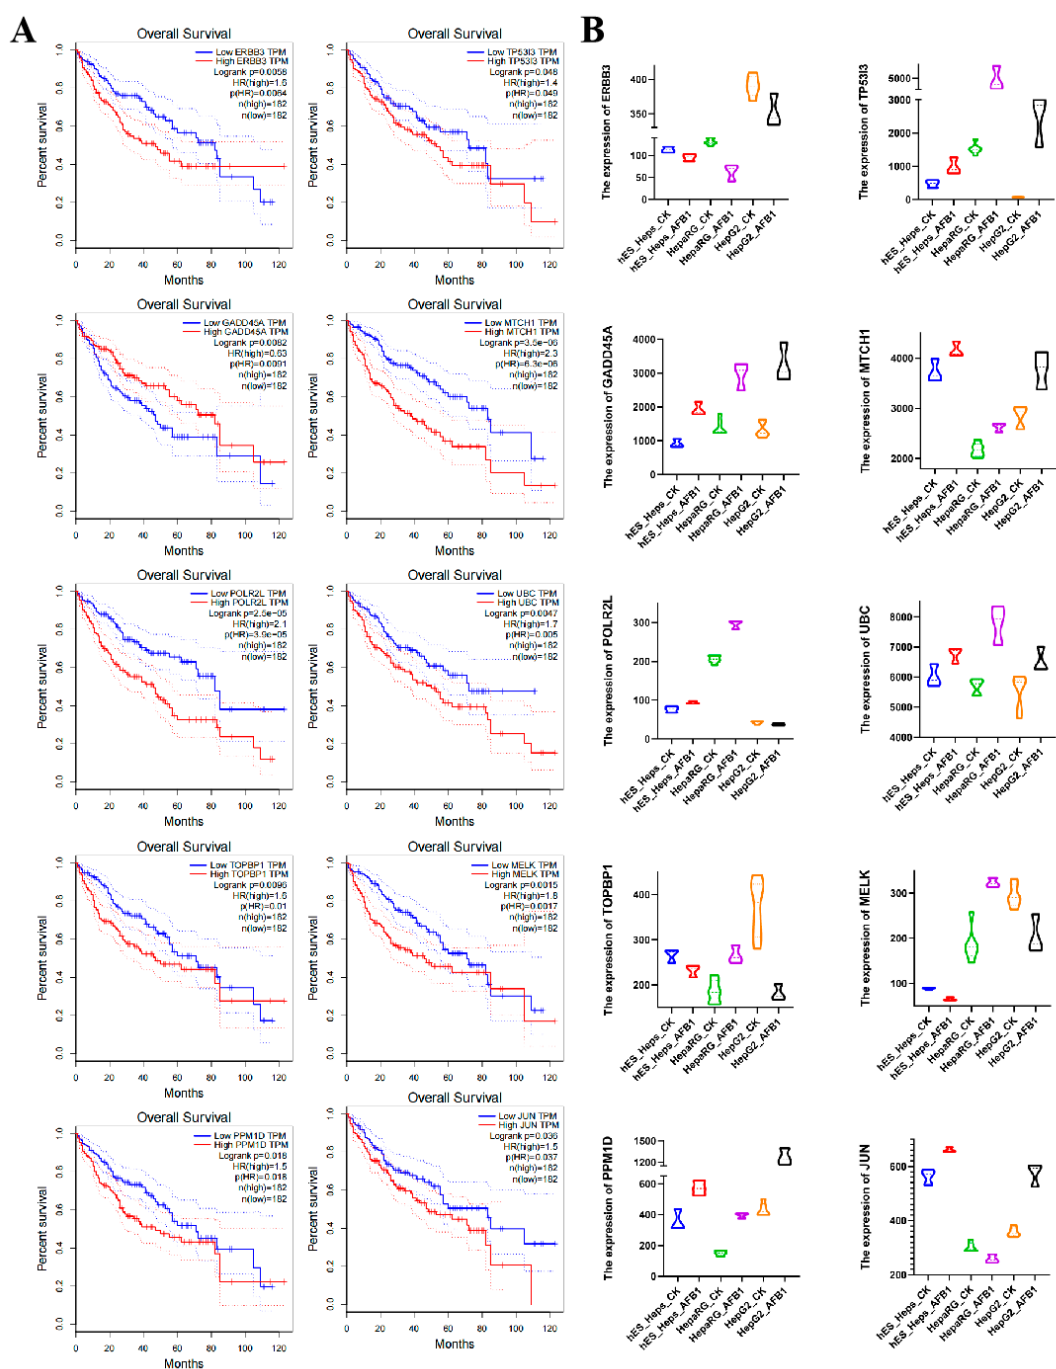

**Figure S1.** Survival analysis of core genes in the TCGA-LIHC cohort (A) and their expression in GEO datasets (B).

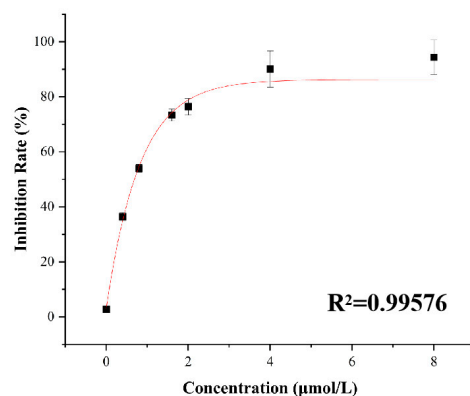

**Figure S2.** The dose-response curves of cell viability caused by AFB1 in HepG2 cells as determined by CCK-8 assays.

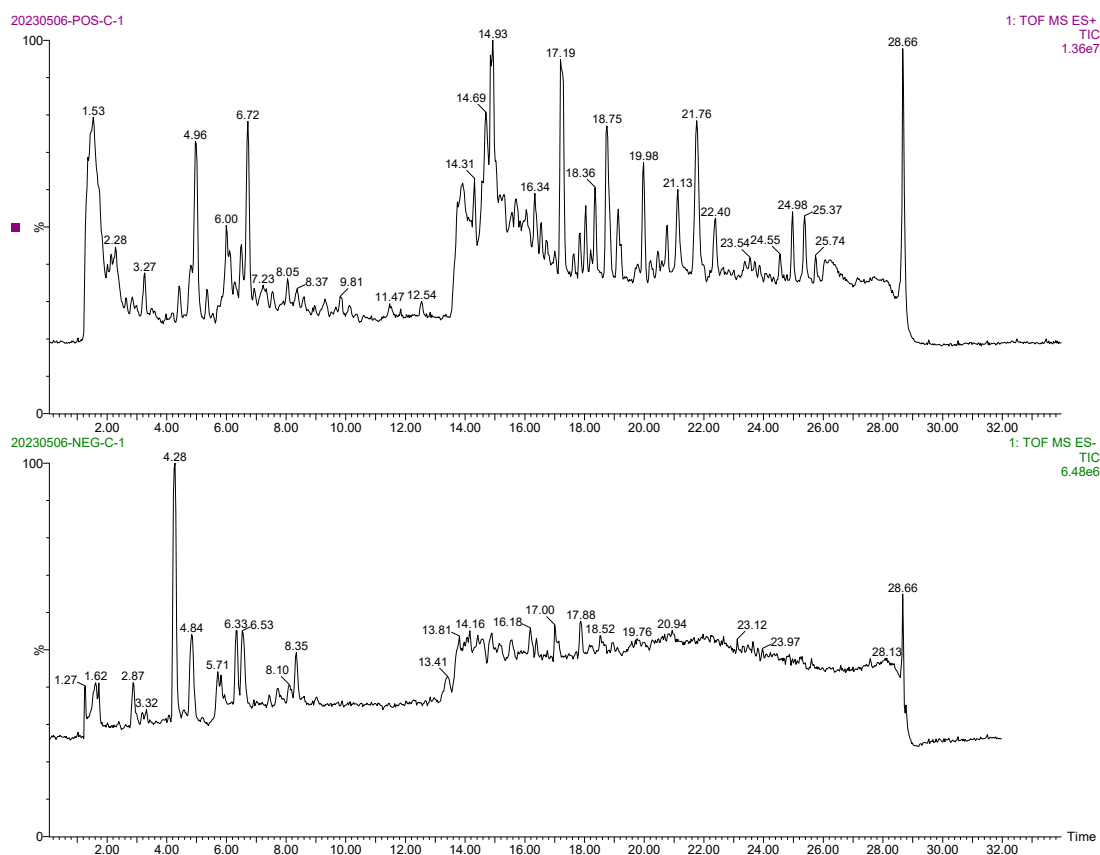

**Figure S3.** Chromatographic lipid profiles of HepG2 cells in positive and negative ion modes.

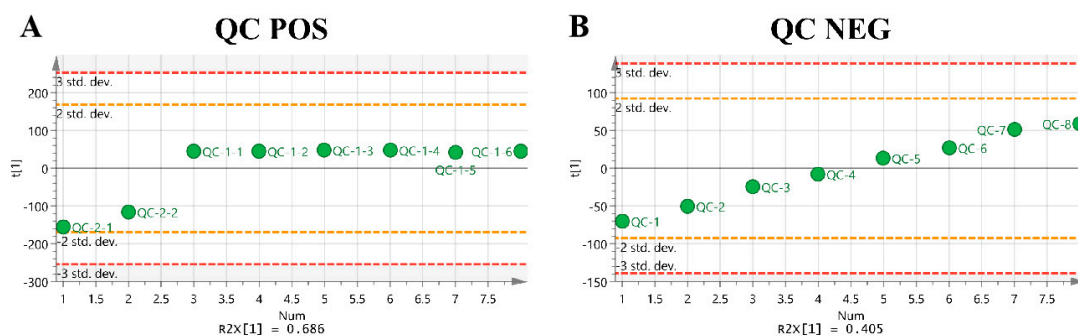

**Figure S4.** Evaluation of QC samples in the positive and negative mode.

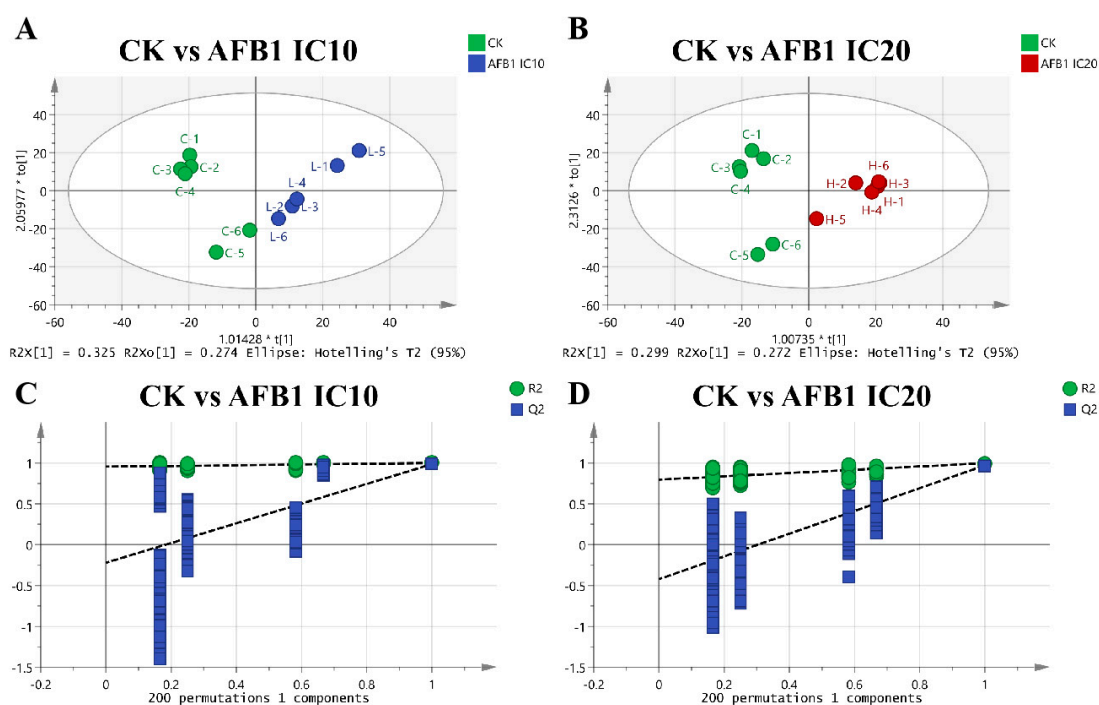

**Figure S5.** The evaluations of the non-targeted lipidomics OPLS-DA models in the comparison between the control group and AFB1 exposure groups. (A) Comparison between the control group and the IC<sub>10</sub> group: intercept values of R2 and Q2 were 0.955 and -0.22, respectively; (B) Comparison between the control group and the IC<sub>20</sub> group: intercept values of R2 and Q2 were 0.797 and -0.422, respectively.

**Table S1.** Detailed information on the differential expression lipids.

| Metabolites                                             | Compound ID  | Class | Sub Class | CK VS AFB1 IC10 |      |      | CK VS AFB1 IC20 |      |      |
|---------------------------------------------------------|--------------|-------|-----------|-----------------|------|------|-----------------|------|------|
|                                                         |              |       |           | P-value         | FC   | VIP  | P-value         | FC   | VIP  |
| Dihydrocycloartomunin                                   | 10072454     | PK    | PK        | 0.03            | 0.36 | 1.67 | 0.03            | 0.34 | 1.37 |
| Angoluvarin                                             | 639275       | PK    | PK        | 0.03            | 0.13 | 1.54 | 0.02            | 0.09 | 1.45 |
| BMP 16:3_20:5                                           | 138217136    | GP    | BMP       | 0.03            | 0.31 | 1.6  | 0.01            | 0.21 | 1.64 |
| LPG 20:2                                                | 138119475    | GP    | LPG       | 0.01            | 0.18 | 1.82 | 0.02            | 0.21 | 1.61 |
| NA 18:2;O3                                              | LMFA08020334 | FA    | NA        | 0.04            | 0.05 | 1.43 | 0.03            | 0    | 1.4  |
| FA 34:6;O2                                              | 122490529    | FA    | FA        | 0.02            | 0.05 | 1.59 | 0.02            | 0.04 | 1.49 |
| SL 15:3;O/16:3                                          | 164263236    | SL    | SL        | 0.04            | 0.03 | 1.44 | 0.04            | 0.02 | 1.35 |
| SM 20:1;2O/12:0                                         | 138237213    | SP    | SM        | 0.01            | 0.05 | 1.68 | 0.03            | 0.13 | 1.37 |
| cis:corosolone                                          | 11093061     | PK    | PK        | 0.02            | 0.26 | 1.42 | 0.04            | 0.32 | 1.55 |
| PE: Cer 16:1;2O/26:7                                    | 165198142    | SP    | PE-Cer    | 0.03            | 0.12 | 1.5  | 0.03            | 0.07 | 1.52 |
| BMP 10:0_20:1                                           | 138154018    | GP    | BMP       | 0.03            | 0.1  | 1.52 | 0.02            | 0.06 | 1.5  |
| DLCL 20:0_24:1                                          | 165197585    | GP    | DLCL      | 0.03            | 0.13 | 1.53 | 0.03            | 0.13 | 1.5  |
| Myxol 2'-methyl hexoside                                | 162910692    | PR    | PR        | 0.03            | 0.04 | 1.54 | 0.03            | 0.05 | 1.49 |
| ST 24:1;O4;G/20:4                                       | 164497435    | ST    | ST        | 0.03            | 0.5  | 1.25 | 0.05            | 0.44 | 1.5  |
| Cer 14                                                  | 164230884    | SP    | Cer       | 0.05            | 0.17 | 1.4  | 0.03            | 0.08 | 1.51 |
| PA 38:8                                                 | 52928981     | GP    | PA        | 0.02            | 0.03 | 1.58 | 0.02            | 0.04 | 1.48 |
| PE 16:0_22:6                                            | 6426738      | GP    | PE        | 0.02            | 0.1  | 1.6  | 0.01            | 0.01 | 1.62 |
| PI 39:1                                                 | LMGP06010241 | GP    | PI        | 0.03            | 0.07 | 1.47 | 0.02            | 0.01 | 1.44 |
| PC O-24:6_11:0                                          | 165185238    | GP    | PC        | 0.02            | 0.07 | 1.6  | 0.02            | 0.01 | 1.58 |
| SM 34:3;2O/3:0                                          | 164283258    | SP    | SM        | 0.03            | 0.12 | 1.59 | 0.01            | 0.02 | 1.67 |
| PG O-26:7_11:0                                          | 165241756    | GP    | PG        | 0.03            | 0.13 | 1.54 | 0.01            | 0.01 | 1.63 |
| Delphinidin 3-(6''-malonylglucoside):5-malonylglucoside | 11972331     | PK    | PK        | 0.02            | 0.07 | 1.64 | 0.01            | 0    | 1.66 |
| SHexCer 17:1;2O/20:2                                    | 138185909    | SP    | SHexCer   | 0.03            | 0.14 | 1.53 | 0.01            | 0.01 | 1.63 |
| DGDG O-11:0_18:5                                        | 164308181    | GL    | DGDG      | 0.02            | 0.09 | 1.62 | 0.01            | 0    | 1.66 |
| Volicitin                                               | 10960832     | FA    | FA        | 0.05            | 0.2  | 1.44 | 0.01            | 0.04 | 1.65 |
| ADGGA 22                                                | 138196138    | GL    | ADGGA     | 0.04            | 0.23 | 1.43 | 0.03            | 0.17 | 1.55 |
| MGDG O-26:2_28:7                                        | 164447231    | GL    | MGDG      | 0.04            | 0.07 | 1.48 | 0.03            | 0.02 | 1.52 |
| PC 11:0_26:6                                            | 164242650    | GP    | PC        | 0.04            | 0.16 | 1.52 | 0.01            | 0.02 | 1.66 |
| LNAPS 17:2/N:24:2                                       | 165226409    | GP    | LNAPS     | 0.01            | 0.02 | 1.74 | 0.01            | 0    | 1.69 |

|                                                                         |              |    |          |      |      |      |      |      |      |
|-------------------------------------------------------------------------|--------------|----|----------|------|------|------|------|------|------|
| PC O-17:2_22:6                                                          | 165321844    | GP | EtherPC  | 0.02 | 0.08 | 1.64 | 0.01 | 0.01 | 1.65 |
| Cer 23:0;2O/13:0                                                        | 138281970    | SP | Cer      | 0.02 | 0.03 | 1.66 | 0.02 | 0    | 1.61 |
| ST 27:2;O6;Hex                                                          | 101514326    | ST | ST       | 0.04 | 0.02 | 1.51 | 0.04 | 0    | 1.43 |
| MGDG O-28:2_7:0                                                         | 164214536    | GL | MGDG     | 0.02 | 0.05 | 1.7  | 0.01 | 0.01 | 1.67 |
| NAGlySer 26:7/19:2                                                      | 164300449    | FA | NAGlySer | 0.02 | 0.1  | 1.64 | 0.01 | 0.03 | 1.67 |
| PS O-23:0_21:2                                                          | 165186783    | GP | PS       | 0.01 | 0.04 | 1.71 | 0.01 | 0    | 1.67 |
| Cer 18:1;2O/22:6                                                        | 164247266    | SP | Cer      | 0.04 | 0.14 | 1.43 | 0.02 | 0.05 | 1.54 |
| PE O-21:0_13:1                                                          | 164394718    | GP | PE       | 0.01 | 0.04 | 1.7  | 0.01 | 0    | 1.65 |
| 5,7,4':Trihydroxyflavanone<br>7:sulfate                                 | 15460423     | PK | PK       | 0.02 | 0.04 | 1.61 | 0.02 | 0    | 1.54 |
| Cer 16:3;2O/36:10                                                       | 164405304    | SP | Cer      | 0.01 | 0.03 | 1.71 | 0.01 | 0    | 1.65 |
| MGDG 23:0_14:1                                                          | 138297017    | GL | MGDG     | 0.02 | 0.08 | 1.65 | 0.01 | 0.01 | 1.66 |
| PI 28:2;O2                                                              | LMGP20050001 | GP | PI       | 0.02 | 0.02 | 1.69 | 0.01 | 0    | 1.65 |
| PE:Cer 18:3;2O/18:4                                                     | 165187687    | SP | PE-Cer   | 0.01 | 0.03 | 1.72 | 0.01 | 0    | 1.67 |
| DGGA 15:0_26:4                                                          | 138301667    | GL | DGGA     | 0.03 | 0.02 | 1.54 | 0.03 | 0.02 | 1.52 |
| PA O-35:2                                                               | 52929590     | GP | PA       | 0.02 | 0.07 | 1.57 | 0.02 | 0.01 | 1.57 |
| SM 14:3;2O/30:6                                                         | 164193399    | SP | SM       | 0.03 | 0.05 | 1.57 | 0.02 | 0.01 | 1.58 |
| PS 41:7                                                                 | 138223286    | GP | PS       | 0.01 | 0.06 | 1.68 | 0.01 | 0    | 1.69 |
| LDGCC 28:6                                                              | 164350874    | GL | LDGCC    | 0.01 | 0.01 | 1.7  | 0.01 | 0    | 1.64 |
| HexCer 34:3;O3                                                          | 53355808     | SP | HexCer   | 0.02 | 0.03 | 1.6  | 0.02 | 0    | 1.53 |
| PG O-36:5                                                               | 52927322     | GP | PG       | 0.02 | 0.04 | 1.55 | 0.02 | 0.01 | 1.49 |
| DGGA 13:0_20:0                                                          | 138211085    | GL | DGGA     | 0.03 | 0.14 | 1.5  | 0.01 | 0.01 | 1.62 |
| HexCer 9:1;2O/42:8                                                      | 164474301    | SP | HexCer   | 0.01 | 0.02 | 1.72 | 0.01 | 0    | 1.69 |
| PE 33:0_16:4                                                            | 164421036    | GP | PE       | 0.05 | 0.12 | 1.41 | 0.03 | 0.01 | 1.5  |
| Cer 18:3;2O/42:10                                                       | 164349319    | SP | Cer      | 0.05 | 0.09 | 1.42 | 0.03 | 0.01 | 1.48 |
| ST 24:1;O4;GlcA                                                         | 195891       | ST | ST       | 0.01 | 0.03 | 1.71 | 0.01 | 0    | 1.67 |
| MGDG O-16:2_19:0                                                        | 164207779    | GL | MGDG     | 0.01 | 0.04 | 1.7  | 0.01 | 0    | 1.69 |
| Gossypetin 7:methyl ether 8:ac-<br>etate                                | 44260028     | PK | PK       | 0.01 | 0.02 | 1.73 | 0.01 | 0    | 1.69 |
| NAGlySer 26:6/26:2                                                      | 164472565    | FA | NAGlySer | 0.01 | 0.02 | 1.71 | 0.01 | 0    | 1.68 |
| MGDG O-22:2_28:7                                                        | 164446417    | GL | MGDG     | 0.02 | 0.02 | 1.72 | 0.01 | 0    | 1.68 |
| NAGly 24:3/24:4                                                         | 164301579    | FA | NAGly    | 0.03 | 0.15 | 1.49 | 0.01 | 0    | 1.67 |
| PS O-18:2_26:0                                                          | 165286386    | GP | PS       | 0.01 | 0.03 | 1.73 | 0.01 | 0.01 | 1.69 |
| HexCer 10:1;2O/44:9                                                     | 164422317    | SP | HexCer   | 0.02 | 0.02 | 1.7  | 0.01 | 0    | 1.66 |
| SMGDG O-21:1_28:7                                                       | 165193134    | GL | SMGDG    | 0.01 | 0.01 | 1.72 | 0.01 | 0    | 1.66 |
| NAGlySer 26:6/13:1                                                      | 164505907    | FA | NAGlySer | 0.02 | 0.06 | 1.67 | 0.01 | 0    | 1.68 |
| SHexCer 26:1;2O/24:2;O                                                  | 164349519    | SP | SHexCer  | 0.04 | 0.02 | 1.51 | 0.03 | 0    | 1.5  |
| Cer 17                                                                  | 164344202    | SP | Cer      | 0.02 | 0.09 | 1.61 | 0.01 | 0.03 | 1.63 |
| PG O-20:3_26:1                                                          | 165222721    | GP | PG       | 0.01 | 0.02 | 1.73 | 0.01 | 0    | 1.69 |
| PI 17:0_25:0                                                            | 133033913    | GP | PI       | 0.03 | 0.04 | 1.54 | 0.03 | 0.02 | 1.54 |
| NAGlySer 24:6/26:1                                                      | 164509591    | FA | NAGlySer | 0.02 | 0.05 | 1.68 | 0.01 | 0    | 1.69 |
| PS O-22:3_25:0                                                          | 165302935    | GP | PS       | 0.01 | 0.03 | 1.72 | 0.01 | 0    | 1.69 |
| HexCer 9:0;3O/27:0;(2OH)                                                | 164487376    | SP | HexCer   | 0.01 | 0.03 | 1.72 | 0.01 | 0    | 1.69 |
| TG 58:9                                                                 | 56938357     | GL | TG       | 0.01 | 0.04 | 1.7  | 0.01 | 0    | 1.69 |
| Pseudoecgonyl:CoA                                                       | 71448901     | FA | FA       | 0.02 | 0.05 | 1.69 | 0.01 | 0    | 1.7  |
| Hex3Cer 36:9;2O                                                         | 165328057    | SP | Hex3Cer  | 0.02 | 0.02 | 1.67 | 0.01 | 0    | 1.63 |
| PE O-18:0_20:3;O                                                        | 138312495    | GP | PE       | 0.01 | 0.05 | 1.69 | 0.01 | 0    | 1.69 |
| DGGA 17:0_24:1                                                          | 138125605    | GL | DGGA     | 0.01 | 0.03 | 1.71 | 0.01 | 0    | 1.69 |
| 3':Hydroxy:3,5,8,4',5':pentam-<br>ethoxy:6,7:methylenedioxyfla-<br>vone | 44260079     | PK | PK       | 0.01 | 0.03 | 1.72 | 0.01 | 0    | 1.69 |
| PI 16:0_20:5;4O                                                         | 138304108    | GP | PI       | 0.01 | 0.02 | 1.72 | 0.01 | 0    | 1.68 |
| NAOrn 22:4/11:0                                                         | 164465359    | FA | NAOrn    | 0.01 | 0.09 | 1.76 | 0.01 | 0.07 | 1.74 |
| PS 24:0_18:1                                                            | 25245395     | GP | PS       | 0.03 | 0.13 | 1.51 | 0.01 | 0    | 1.68 |
| TG 57:9                                                                 | 56937923     | GL | TG       | 0.01 | 0.02 | 1.73 | 0.01 | 0    | 1.69 |
| PS O-25:0_26:4                                                          | 165212475    | GP | PS       | 0.01 | 0.03 | 1.72 | 0.01 | 0    | 1.69 |
| PE:Cer 21:0;2O/20:2;O                                                   | 165278328    | SP | PE-Cer   | 0.01 | 0.04 | 1.69 | 0.01 | 0    | 1.68 |
| TG 16:2_16:4_28:6                                                       | 165293824    | GL | TG       | 0.01 | 0.04 | 1.7  | 0.01 | 0    | 1.68 |
| DGDG O-18:0_26:1                                                        | 164400850    | GL | DGDG     | 0.02 | 0.05 | 1.68 | 0.01 | 0    | 1.67 |
| PE:Cer 12:0;2O/22:0;O                                                   | 165335864    | SP | PE-Cer   | 0.02 | 0.13 | 1.69 | 0.02 | 0.13 | 1.69 |
| SM 50:12;3O                                                             | 164506400    | SP | SM       | 0.02 | 0.12 | 1.62 | 0.02 | 0.12 | 1.63 |
| DGDG O-11:0_26:6                                                        | 164487280    | GL | DGDG     | 0.02 | 0.08 | 1.59 | 0.01 | 0    | 1.62 |
| SHexCer 30:1;2O/24:2                                                    | 138297699    | SP | SHexCer  | 0.01 | 0.02 | 1.72 | 0.01 | 0    | 1.68 |
| SL 19:3;O/24:0;O                                                        | 164264194    | SL | SL       | 0.01 | 0.06 | 1.69 | 0.01 | 0    | 1.7  |
| HexCer 10:0;2O/44:10                                                    | 164457039    | SP | HexCer   | 0.01 | 0.01 | 1.74 | 0.01 | 0    | 1.68 |
| MGDG 11:0_26:2                                                          | 138126000    | GL | MGDG     | 0.03 | 0.12 | 1.5  | 0.01 | 0    | 1.62 |

|                                                                                                 |              |    |            |      |      |      |      |      |      |
|-------------------------------------------------------------------------------------------------|--------------|----|------------|------|------|------|------|------|------|
| NAGlySer 22:0/20:4                                                                              | 164473045    | FA | NAGlySer   | 0.01 | 0.02 | 1.73 | 0.01 | 0    | 1.67 |
| CoA 14:4;O                                                                                      | LMFA07050380 | FA | CoA        | 0.01 | 0    | 1.73 | 0.01 | 0    | 1.66 |
| Cer 14                                                                                          | 164230884    | SP | Cer        | 0.02 | 0.07 | 1.57 | 0.01 | 0    | 1.58 |
| SM 14:1;2O/26:1                                                                                 | 164472876    | SP | SM         | 0.04 | 0.17 | 1.43 | 0.01 | 0    | 1.66 |
| HexCer 25:1;2O/18:5                                                                             | 164202766    | SP | HexCer     | 0.01 | 0.03 | 1.7  | 0.01 | 0    | 1.67 |
| Hex3Cer 16:0;2O/16:2                                                                            | 164225400    | SP | Hex3Cer    | 0.04 | 0.03 | 1.44 | 0.04 | 0    | 1.41 |
| DGDG 20:2_22:6                                                                                  | 138304449    | GL | DGDG       | 0.04 | 0.03 | 1.5  | 0.04 | 0    | 1.51 |
| PI O-16:0_26:6                                                                                  | 165199042    | GP | PI         | 0.01 | 0.01 | 1.68 | 0.01 | 0    | 1.6  |
| DGDG O-13:0_28:6                                                                                | 164311966    | GL | DGDG       | 0.02 | 0.01 | 1.59 | 0.02 | 0    | 1.53 |
| LDGTS 17:0                                                                                      | 133017289    | GL | LDGTS      | 0.02 | 0.06 | 1.65 | 0.01 | 0.01 | 1.66 |
| ST 30:3;O5                                                                                      | 45273389     | ST | ST         | 0.02 | 0    | 1.65 | 0.02 | 0    | 1.59 |
| HexCer 16:3;2O/30:2;2O                                                                          | 164464512    | SP | HexCer     | 0.01 | 0.01 | 1.75 | 0.01 | 0    | 1.69 |
| Cer 19:3;2O/38:10                                                                               | 164469215    | SP | Cer        | 0.02 | 0.03 | 1.63 | 0.02 | 0    | 1.62 |
| HBMP 16:3_22:6_22:6                                                                             | 138260988    | GP | HBMP       | 0.03 | 0    | 1.55 | 0.03 | 0    | 1.5  |
| DGDG O-16:1_28:0                                                                                | 164199480    | GL | DGDG       | 0.01 | 0    | 1.75 | 0.01 | 0    | 1.69 |
| HexCer 23:2;2O/24:6                                                                             | 164252392    | SP | HexCer     | 0.01 | 0.01 | 1.75 | 0.01 | 0    | 1.69 |
| PS O-20:2_26:1                                                                                  | 165261960    | GP | PS         | 0.01 | 0.01 | 1.75 | 0.01 | 0    | 1.69 |
| PE:Cer 14:3;2O/26:6                                                                             | 165212135    | SP | PE-Cer     | 0.01 | 0.01 | 1.72 | 0.01 | 0    | 1.66 |
| Cer 14                                                                                          | 164230884    | SP | Cer        | 0.02 | 0.07 | 1.65 | 0.01 | 0    | 1.68 |
| DGDG O-11:0_28:5                                                                                | 164465160    | GL | DGDG       | 0.04 | 0    | 1.47 | 0.04 | 0    | 1.43 |
| PE:Cer 26:2;2O/26:7                                                                             | 165190340    | SP | PE-Cer     | 0.01 | 0    | 1.76 | 0.01 | 0    | 1.69 |
| Hex2Cer 42:0;O2                                                                                 | LMSP0501AB18 | SP | Hex2Cer    | 0.01 | 0    | 1.75 | 0.01 | 0    | 1.69 |
| SL 15:3;O/26:7                                                                                  | 164399916    | SL | SL         | 0.04 | 0.02 | 1.44 | 0.04 | 0    | 1.37 |
| NAGlySer 16:2/24:4                                                                              | 164492023    | FA | NAGlySer   | 0.03 | 0.18 | 1.56 | 0.01 | 0.05 | 1.67 |
| PMeOH 17:2_24:4                                                                                 | 138251691    | GP | PMeOH      | 0.01 | 0.01 | 1.73 | 0.01 | 0    | 1.66 |
| PS O-15:0_26:4                                                                                  | 165190931    | GP | PS         | 0.01 | 0.01 | 1.74 | 0.01 | 0    | 1.67 |
| MGDG O-24:2_28:7                                                                                | 164434792    | GL | MGDG       | 0.01 | 0    | 1.74 | 0.01 | 0    | 1.68 |
| CoA 6:1                                                                                         | 163358979    | FA | CoA        | 0.01 | 0    | 1.76 | 0.01 | 0    | 1.69 |
| DG 14:0_20:1                                                                                    | 138282457    | GL | DG         | 0.02 | 0    | 1.62 | 0.02 | 0    | 1.56 |
| DG O-21:0_14:1                                                                                  | 164212284    | GL | DG         | 0.02 | 0.1  | 1.59 | 0.01 | 0    | 1.66 |
| PS 3:0_16:2                                                                                     | 138260835    | GP | PS         | 0.01 | 0    | 1.72 | 0.01 | 0    | 1.63 |
| SM 10:0;2O/28:0                                                                                 | 164396151    | SP | SM         | 0.02 | 0.05 | 1.65 | 0.01 | 0    | 1.63 |
| SM 18:1;2O/34:8                                                                                 | 164410511    | SP | SM         | 0.01 | 0.01 | 1.75 | 0.01 | 0.01 | 1.67 |
| MGDG 24:4_26:4                                                                                  | 138132486    | GL | MGDG       | 0.04 | 0.01 | 1.49 | 0.04 | 0.01 | 1.46 |
| Ganocasurarin A                                                                                 | 156582628    | PR | PR         | 0.05 | 0    | 1.45 | 0.05 | 0    | 1.43 |
| HBMP 16:3_16:4_20:3                                                                             | 138199135    | GP | HBMP       | 0.01 | 0.02 | 1.71 | 0.01 | 0    | 1.67 |
| PG 18:0_18:0;O                                                                                  | 138168075    | GP | PG         | 0.02 | 0    | 1.67 | 0.02 | 0    | 1.59 |
| PG O-26:0_26:6                                                                                  | 165331750    | GP | PG         | 0.01 | 0    | 1.75 | 0.01 | 0    | 1.68 |
| DGDG O-22:1_23:0                                                                                | 164422245    | GL | DGDG       | 0.01 | 0    | 1.76 | 0.01 | 0    | 1.69 |
| PIM2 36:2                                                                                       | LMGP15010073 | GP | PIM2       | 0.01 | 0    | 1.76 | 0.01 | 0    | 1.69 |
| Apigenin 7:rrhamnoside:4':ruti-<br>noside                                                       | 163011040    | PK | PK         | 0.01 | 0    | 1.76 | 0.01 | 0    | 1.69 |
| FA 26:4                                                                                         | 165283605    | FA | FA         | 0.01 | 0.05 | 1.71 | 0.01 | 0.01 | 1.69 |
| MGDG O-22:0_28:6                                                                                | 164384720    | GL | MGDG       | 0.01 | 0    | 1.75 | 0.01 | 0    | 1.69 |
| ADGGA 22                                                                                        | 138196138    | GL | ADGGA      | 0.01 | 0    | 1.75 | 0.01 | 0    | 1.68 |
| PA 17:2_18:5                                                                                    | 138286781    | GP | PA         | 0.01 | 0    | 1.75 | 0.01 | 0    | 1.69 |
| SM 10:1;2O/34:9                                                                                 | 164229071    | SP | SM         | 0.03 | 0    | 1.54 | 0.03 | 0    | 1.48 |
| PI:Cer 22:3;2O/26:0;O                                                                           | 165317787    | SP | PI-Cer     | 0.01 | 0    | 1.75 | 0.01 | 0    | 1.69 |
| SM 10:1;2O/42:9                                                                                 | 164278400    | SP | SM         | 0.05 | 0    | 1.45 | 0.05 | 0    | 1.43 |
| SL 21:0;O/26:3                                                                                  | 164425253    | SL | SL         | 0.05 | 0    | 1.4  | 0.05 | 0    | 1.31 |
| MGDG O-16:3_28:6                                                                                | 164397582    | GL | MGDG       | 0.04 | 0    | 1.46 | 0.04 | 0    | 1.42 |
| Cer 15                                                                                          | 164412894    | SP | Cer        | 0.03 | 0    | 1.55 | 0.03 | 0    | 1.52 |
| NAOrn 26:7/22:4                                                                                 | 164507812    | FA | NAOrn      | 0.03 | 0.02 | 1.51 | 0.03 | 0    | 1.47 |
| LDGTS 20:5                                                                                      | 138274914    | GL | LDGTS      | 0.02 | 0.01 | 1.65 | 0.02 | 0    | 1.61 |
| PS O-22:0_20:1                                                                                  | 165285753    | GP | PS         | 0.02 | 0.05 | 1.66 | 0.01 | 0    | 1.67 |
| alpha,alpha':Trehalose 4,6:di-<br>oleate                                                        | LMSL03001273 | SL | SL         | 0.02 | 0.01 | 1.57 | 0.02 | 0    | 1.48 |
| DLCL 24:0_16:2                                                                                  | 165205240    | GP | DLCL       | 0.02 | 0    | 1.66 | 0.02 | 0    | 1.59 |
| SM 42:1;3O                                                                                      | 164377505    | SP | SM+O       | 0.01 | 0.01 | 1.74 | 0.01 | 0    | 1.66 |
| MGDG O-11:0_28:1                                                                                | 164238376    | GL | MGDG       | 0.01 | 0.01 | 1.74 | 0.01 | 0    | 1.67 |
| 10S,11R:dichlorO-7,11:dime-<br>thyl:3:methylene:4R:hy-<br>droxy:6E,8E,12:tridecatienoic<br>acid | 21632532     | PR | PR         | 0.05 | 0    | 1.45 | 0.05 | 0    | 1.36 |
| PI O-25:0_26:5                                                                                  | 165276954    | GP | PI         | 0.03 | 0.01 | 1.52 | 0.03 | 0    | 1.5  |
| HexCer 40:0;2O                                                                                  | 164224204    | SP | HexCer-NDS | 0.01 | 0.01 | 1.73 | 0.01 | 0    | 1.67 |

|                                                          |              |    |         |      |      |      |      |      |      |
|----------------------------------------------------------|--------------|----|---------|------|------|------|------|------|------|
| MGDG O-24:4_22:5                                         | 164194992    | GL | MGDG    | 0.03 | 0.01 | 1.54 | 0.03 | 0    | 1.5  |
| MGDG O-28:7_20:0                                         | 164289169    | GL | MGDG    | 0.03 | 0.01 | 1.55 | 0.03 | 0    | 1.5  |
| 1'-Hydroxy:4:ketO-gamma:carotene glucoside hexadecanoate | 101534475    | PR | PR      | 0.02 | 0.01 | 1.64 | 0.02 | 0    | 1.6  |
| HexCer 28:3;3O(FA 17:2)                                  | 165292263    | SP | HexCer  | 0.02 | 0.02 | 1.59 | 0.02 | 0    | 1.55 |
| Myricetin 3,7:diglucuronide                              | 102274234    | PK | PK      | 0.03 | 0.09 | 1.56 | 0.02 | 0.03 | 1.53 |
| BMP 22:1_22:4                                            | 138245890    | GP | BMP     | 0.03 | 0    | 1.57 | 0.03 | 0    | 1.53 |
| DG 22:3_34:9                                             | 164291440    | GL | DG      | 0.04 | 0.01 | 1.4  | 0.04 | 0    | 1.33 |
| p:coumaroyl:homoserine lactone                           | 71311837     | FA | FA      | 0.04 | 0.05 | 1.5  | 0.03 | 0    | 1.49 |
| LNAPE 22:2/N:23:0                                        | 165286777    | GP | LNAPE   | 0.01 | 0    | 1.74 | 0.01 | 0    | 1.67 |
| 18:bromO-octadecanoic acid                               | 5312948      | FA | FA      | 0.01 | 0    | 1.72 | 0.01 | 0    | 1.64 |
| MGDG O-28:5_22:3                                         | 164213344    | GL | MGDG    | 0.05 | 0.01 | 1.44 | 0.04 | 0    | 1.43 |
| DGDG O-16:4_4:0                                          | 164434480    | GL | DGDG    | 0.05 | 0    | 1.42 | 0.05 | 0    | 1.32 |
| SMGDG O-24:4_2:0                                         | 165278327    | GL | SMGDG   | 0.04 | 0    | 1.5  | 0.04 | 0    | 1.4  |
| DGDG 25:0_17:2                                           | 138140439    | GL | DGDG    | 0.02 | 0.01 | 1.66 | 0.02 | 0    | 1.62 |
| MGDG O-22:4_28:3                                         | 164255113    | GL | MGDG    | 0.02 | 0.02 | 1.64 | 0.02 | 0    | 1.59 |
| HexCer 18:1;2O/24:5                                      | 164384224    | SP | HexCer  | 0.03 | 0.04 | 1.51 | 0.02 | 0    | 1.51 |
| MGMG 16:2                                                | LMGL04010008 | GL | MGMG    | 0.04 | 0.03 | 1.44 | 0.04 | 0    | 1.44 |
| MGDG 24:1_26:4                                           | 138183244    | GL | MGDG    | 0.02 | 0.03 | 1.58 | 0.02 | 0    | 1.57 |
| PI O-23:0_26:0                                           | 165218719    | GP | PI      | 0.04 | 0.03 | 1.45 | 0.04 | 0    | 1.45 |
| PI O-24:2_26:7                                           | 165269073    | GP | PI      | 0.04 | 0.01 | 1.49 | 0.04 | 0    | 1.49 |
| FAHFA 20:3/26:0                                          | 138260571    | FA | FAHFA   | 0.02 | 0.22 | 1.6  | 0.03 | 0.27 | 1.36 |
| FOH 14:0                                                 | 8209         | FA | FOH     | 0.02 | 0.09 | 1.56 | 0.01 | 0    | 1.65 |
| BMP 23:0_22:5                                            | 138301187    | GP | BMP     | 0.04 | 0.12 | 1.37 | 0.02 | 0    | 1.54 |
| BMP 27:0_20:5                                            | 138231287    | GP | BMP     | 0.03 | 0.13 | 1.43 | 0.01 | 0    | 1.63 |
| PG O-17:0_26:3                                           | 165266759    | GP | PG      | 0.03 | 0.06 | 1.5  | 0.02 | 0    | 1.53 |
| SM 42:3;2O                                               | 164243513    | SP | SM      | 0.04 | 0.1  | 1.43 | 0.02 | 0    | 1.52 |
| SQDG 20:0_18:2                                           | 138117475    | GL | SQDG    | 0.03 | 0.03 | 1.51 | 0.02 | 0    | 1.46 |
| MGDG O-20:0_28:7                                         | 164237037    | GL | MGDG    | 0.04 | 0.09 | 1.43 | 0.02 | 0    | 1.52 |
| BMP 21:0_26:4                                            | 138208293    | GP | BMP     | 0.02 | 0.02 | 1.65 | 0.01 | 0    | 1.63 |
| HexCer 23:1;2O/20:3                                      | 164484573    | SP | HexCer  | 0.02 | 0.06 | 1.57 | 0.02 | 0    | 1.61 |
| HexCer 16:2;2O/31:1;O                                    | 164422643    | SP | HexCer  | 0.04 | 0.01 | 1.46 | 0.04 | 0    | 1.44 |
| ST 29:0;O3                                               | 3036251      | ST | ST      | 0.04 | 0.06 | 1.45 | 0.03 | 0    | 1.51 |
| 8:Hydroxyapigenin 8:(2'',4'':disulfatoglucuronide)       | 5318665      | PK | PK      | 0.02 | 0.02 | 1.7  | 0.02 | 0    | 1.66 |
| Hex2Cer 16:0;2O/16:1                                     | 164401774    | SP | Hex2Cer | 0.03 | 0.01 | 1.47 | 0.03 | 0    | 1.39 |
| DG 16:2_40:11                                            | 164342974    | GL | DG      | 0.02 | 0.03 | 1.64 | 0.02 | 0    | 1.59 |
| NAOrn 16:2/26:1                                          | 164307463    | FA | NAOrn   | 0.03 | 0.04 | 1.51 | 0.02 | 0    | 1.53 |
| HexCer 26:0;2O/26:5                                      | 164226371    | SP | HexCer  | 0.02 | 0.02 | 1.71 | 0.01 | 0    | 1.68 |
| HexCer 29:0;2O/20:4                                      | 164406935    | SP | HexCer  | 0.03 | 0.11 | 1.51 | 0.01 | 0.01 | 1.65 |
| Cer 8:0;3O/38:0;(2OH)                                    | 164219685    | SP | Cer     | 0.03 | 0.11 | 1.52 | 0.01 | 0    | 1.67 |
| SL 22:3;O/24:2;O                                         | 164205863    | SL | SL      | 0.02 | 0    | 1.66 | 0.02 | 0    | 1.61 |
| DG O-28:7_28:7                                           | 164294319    | GL | DG      | 0.01 | 0.04 | 1.67 | 0.01 | 0    | 1.67 |
| SMGDG O-13:0_28:2                                        | 165216205    | GL | SMGDG   | 0.02 | 0.02 | 1.61 | 0.02 | 0    | 1.56 |
| Isoscutellarein 4'-methyl ether                          | 5318670      | PK | PK      | 0.02 | 0.07 | 1.58 | 0.01 | 0    | 1.63 |
| 8:(2'',4'':disulfatoglucuronide)                         |              |    |         |      |      |      |      |      |      |
| BMP 24:0_26:4                                            | 138142843    | GP | BMP     | 0.02 | 0.08 | 1.55 | 0.01 | 0    | 1.64 |
| FA 22:7;O2                                               | 131840732    | FA | FA      | 0.03 | 0.38 | 1.63 | 0.01 | 0.31 | 1.7  |
| BMP 5:0_7:0                                              | 138141350    | GP | BMP     | 0.03 | 0.37 | 1.57 | 0.01 | 0.2  | 1.71 |
| ST 24:6;O5                                               | 5284110      | ST | ST      | 0.02 | 0.41 | 1.6  | 0.01 | 0.27 | 1.68 |
| DGDG O-17:2_9:0                                          | 164451014    | GL | DGDG    | 0.02 | 0.12 | 1.57 | 0.01 | 0.11 | 1.57 |
| Austrobuxusin K                                          | 154585435    | PR | PR      | 0.03 | 0.3  | 1.55 | 0.01 | 0.14 | 1.66 |
| SM 17:3;2O/3:0                                           | 164301546    | SP | SM      | 0.04 | 0.14 | 1.45 | 0.04 | 0.12 | 1.37 |
| ST 23:4;O6                                               | 164613318    | ST | ST      | 0.02 | 0.26 | 1.61 | 0.01 | 0.13 | 1.73 |
| Nitiducol                                                | 5378475      | PK | PK      | 0.02 | 0.14 | 1.5  | 0.02 | 0.08 | 1.49 |
| Phytol diphosphate(1)                                    | 14556929     | PR | PR      | 0.04 | 0.35 | 1.44 | 0.02 | 0.23 | 1.66 |
| 5,7:Dimethoxy:8:prenylflavan                             | 44257186     | PK | PK      | 0.02 | 0.23 | 1.61 | 0.02 | 0.15 | 1.59 |
| Uscharidin                                               | 441874       | ST | ST      | 0.02 | 0.11 | 1.54 | 0.02 | 0.06 | 1.47 |
| BMP 25:0_26:4                                            | 138220416    | GP | BMP     | 0.01 | 0.01 | 1.72 | 0.01 | 0    | 1.65 |
| ADGGA 20                                                 | 138206483    | GL | ADGGA   | 0.02 | 0.02 | 1.65 | 0.01 | 0    | 1.6  |
| Cer 23:2;2O/40:8                                         | 164198423    | SP | Cer     | 0.02 | 0.02 | 1.64 | 0.02 | 0.02 | 1.6  |
| MGDG O-24:0_28:7                                         | 164254044    | GL | MGDG    | 0.02 | 0.01 | 1.61 | 0.02 | 0    | 1.57 |
| LDGCC 40:9                                               | 164371317    | GL | LDGCC   | 0.01 | 0    | 1.76 | 0.01 | 0    | 1.69 |
| HexCer 10:0;2O/42:1                                      | 164287587    | SP | HexCer  | 0.02 | 0.02 | 1.64 | 0.02 | 0.03 | 1.6  |
| HexCer 31:0;2O/22:5                                      | 164476811    | SP | HexCer  | 0.01 | 0.06 | 1.67 | 0.01 | 0.04 | 1.66 |

|                                                            |              |    |        |      |      |      |      |      |      |
|------------------------------------------------------------|--------------|----|--------|------|------|------|------|------|------|
| HexCer 15:1;2O/40:5                                        | 164473229    | SP | HexCer | 0.01 | 0.05 | 1.67 | 0.01 | 0.05 | 1.66 |
| DGDG 13:0_27:0                                             | 138188075    | GL | DGDG   | 0.03 | 0    | 1.52 | 0.03 | 0    | 1.42 |
| PG O-26:0_20:2                                             | 165317269    | GP | PG     | 0.02 | 0    | 1.67 | 0.02 | 0    | 1.58 |
| TG 53:4                                                    | 56937354     | GL | TG     | 0.01 | 0    | 1.73 | 0.01 | 0.04 | 1.62 |
| HexCer 23:3;2O/32:2                                        | 164285915    | SP | HexCer | 0.01 | 0.07 | 1.71 | 0.02 | 0.15 | 1.57 |
| Cer 22                                                     | 164385781    | SP | Cer    | 0.03 | 0    | 1.53 | 0.03 | 0.02 | 1.45 |
| DG 17:2_42:10                                              | 164216726    | GL | DG     | 0.03 | 0    | 1.57 | 0.03 | 0.01 | 1.47 |
| Cer 23:2;2O/42:8                                           | 164278962    | SP | Cer    | 0.02 | 0    | 1.67 | 0.02 | 0.02 | 1.6  |
| PI:Cer 48:3;3O                                             | 164227319    | SP | PI-Cer | 0.02 | 0    | 1.67 | 0.02 | 0.01 | 1.6  |
| HexCer 35:0;3O/13:0;(2OH)                                  | 164484458    | SP | HexCer | 0.04 | 0    | 1.51 | 0.04 | 0    | 1.43 |
| SM 31:2;2O/20:0                                            | 164225597    | SP | SM     | 0.01 | 0    | 1.73 | 0.02 | 0.05 | 1.63 |
| NAOrn 18:5/21:0                                            | 164498444    | FA | NAOrn  | 0.02 | 0    | 1.66 | 0.02 | 0.04 | 1.51 |
| TG 56:5                                                    | 56937445     | GL | TG     | 0.01 | 0    | 1.72 | 0.02 | 0.06 | 1.58 |
| DG 15:1_44:10                                              | 164253521    | GL | DG     | 0.02 | 0    | 1.61 | 0.03 | 0.04 | 1.47 |
| TG 16:0_17:0_22:5                                          | 138206196    | GL | TG     | 0.02 | 0    | 1.6  | 0.03 | 0.06 | 1.44 |
| HexCer 13:0;2O/42:4                                        | 164190451    | SP | HexCer | 0.01 | 0    | 1.74 | 0.04 | 0.2  | 1.46 |
| 7,8,4':Trihydroxy:3',5':di-methoxyflavanone 4':O-glucoside | 42607837     | PK | PK     | 0.04 | 0    | 1.49 | 0.05 | 0.03 | 1.39 |
| DG 22:4_40:7                                               | 164259647    | GL | DG     | 0.04 | 0    | 1.5  | 0.04 | 0.03 | 1.39 |
| HexCer 31:0;2O/22:6                                        | 164411441    | SP | HexCer | 0.02 | 0    | 1.64 | 0.02 | 0.04 | 1.51 |
| NAOrn 16:1/22:5                                            | 164438516    | FA | NAOrn  | 0.04 | 0    | 1.46 | 0.05 | 0.04 | 1.32 |
| Cer 15                                                     | 164412894    | SP | Cer    | 0.04 | 0    | 1.51 | 0.05 | 0.04 | 1.4  |
| HexCer 28:4;3O(FA 18:1)                                    | 165306670    | SP | HexCer | 0.01 | 0    | 1.72 | 0.02 | 0.05 | 1.59 |
| DG 15:1_44:9                                               | 164387657    | GL | DG     | 0.02 | 0    | 1.64 | 0.05 | 0.17 | 1.37 |
| TG 10:0_22:2_30:4                                          | 164367224    | GL | TG     | 0.01 | 0    | 1.74 | 0.04 | 0.19 | 1.45 |
| HexCer 19:3;2O/44:11                                       | 164262437    | SP | HexCer | 0.04 | 0    | 1.53 | 0.04 | 0.03 | 1.41 |
| TG 18:0_18:1_19:2                                          | 165260394    | GL | TG     | 0.01 | 0    | 1.75 | 0.03 | 0.18 | 1.52 |
| DG 16:3_42:6                                               | 164412059    | GL | DG     | 0.02 | 0    | 1.62 | 0.04 | 0.13 | 1.42 |
| HexCer 17:0;2O/44:1                                        | 164262164    | SP | HexCer | 0.02 | 0    | 1.6  | 0.02 | 0    | 1.52 |
| DGCC 21:0_43:0                                             | 164276395    | GL | DGCC   | 0.02 | 0    | 1.64 | 0.02 | 0    | 1.57 |
| DGCC 21:0_44:0                                             | 164205232    | GL | DGCC   | 0.02 | 0    | 1.61 | 0.02 | 0    | 1.57 |
| SM 32:2;2O/38:6                                            | 164483228    | SP | SM     | 0.02 | 0.05 | 1.62 | 0.04 | 0.11 | 1.5  |
| DG 12:0_24:1                                               | 138235455    | GL | DG     | 0.05 | 0    | 1.41 | 0.05 | 0.01 | 1.31 |
| TG 10:0_13:1_31:0                                          | 164293120    | GL | TG     | 0.01 | 0    | 1.72 | 0.01 | 0    | 1.65 |
| R:Oblatone A                                               | LMPK13070005 | PK | PK     | 0.03 | 0.25 | 1.55 | 0.01 | 0.03 | 1.66 |
| FA 28:8;O5                                                 | 11038270     | ST | FA     | 0.02 | 0.25 | 1.53 | 0.03 | 0.27 | 1.51 |
| Patuletin 3:glucoside:7:sulfate                            | 101421040    | PK | PK     | 0.02 | 0.22 | 1.52 | 0.03 | 0.26 | 1.54 |
| SMGDG O-10:0_10:0                                          | 165271414    | GL | SMGDG  | 0.03 | 0.2  | 1.51 | 0.03 | 0.22 | 1.49 |
| SMGDG O-22:6_4:0                                           | 165194863    | GL | SMGDG  | 0.03 | 0.11 | 1.47 | 0.02 | 0.03 | 1.51 |
| FAHFA 4:0/17:1                                             | 138166043    | FA | FAHFA  | 0.05 | 0.3  | 1.29 | 0.01 | 0.14 | 1.58 |
| DGDG 2:0_8:0                                               | 138128354    | GL | DGDG   | 0.04 | 0.04 | 1.32 | 0.05 | 0.06 | 1.18 |
| N:jasmonoyl:dopamine                                       | 11660229     | FA | FA     | 0.02 | 0.19 | 1.53 | 0.02 | 0.16 | 1.56 |
| manumycin                                                  | 6438330      | FA | FA     | 0.03 | 0.14 | 1.43 | 0.02 | 0.05 | 1.46 |
| PA 6:0_22:6                                                | 138201824    | GP | PA     | 0.02 | 0.2  | 1.54 | 0.01 | 0.08 | 1.69 |
| CerP 19:0;2O/2:0                                           | 164220724    | SP | CerP   | 0.02 | 0.19 | 1.55 | 0.01 | 0.1  | 1.62 |
| Heteranthin                                                | 16083083     | PR | PR     | 0.03 | 0.17 | 1.49 | 0.02 | 0.08 | 1.54 |
| ST 28:6;O3                                                 | 10251684     | ST | ST     | 0.02 | 0.2  | 1.52 | 0.01 | 0.14 | 1.57 |
| 6:Methoxykaempferol                                        | 14502653     | PK | PK     | 0.02 | 0.25 | 1.56 | 0.04 | 0.36 | 1.29 |
| 3,7:bis(3:acetylramnoside)                                 |              |    |        |      |      |      |      |      |      |
| (1S):1:hydroxy:23,24:didehydroO-25,26,27:trinorcalciol     | 17756764     | ST | ST     | 0.03 | 0.26 | 1.54 | 0.01 | 0.15 | 1.52 |
| LDGCC 34:3                                                 | 164238901    | GL | LDGCC  | 0.02 | 0.26 | 1.48 | 0.01 | 0.13 | 1.65 |
| LPA 24:1                                                   | 138141870    | GP | LPA    | 0.04 | 0.3  | 1.39 | 0.02 | 0.21 | 1.55 |
| PA 7:0_22:6                                                | 138241050    | GP | PA     | 0.04 | 0.13 | 1.39 | 0.03 | 0.09 | 1.39 |
| DG O-15:1_3:0                                              | 164240649    | GL | DG     | 0.03 | 0.3  | 1.35 | 0.01 | 0.17 | 1.56 |
| FOH 19:4;O3                                                | 6710762      | FA | FOH    | 0.04 | 0.3  | 1.38 | 0.04 | 0.3  | 1.44 |
| LPA 15:0                                                   | 17786738     | GP | LPA    | 0.02 | 0.21 | 1.51 | 0.01 | 0.13 | 1.57 |
| BMP 18:3_18:5                                              | 138152180    | GP | BMP    | 0.03 | 0.23 | 1.46 | 0.01 | 0.13 | 1.54 |
| SMGDG O-10:0_7:0                                           | 165243809    | GL | SMGDG  | 0.04 | 0.15 | 1.41 | 0.03 | 0.11 | 1.38 |
| SPB 27:0;2O                                                | 164430987    | SP | SPB    | 0.03 | 0.2  | 1.47 | 0.01 | 0.04 | 1.74 |
| LNAPS 4:0/N:16:2                                           | 165297097    | GP | LNAPS  | 0.04 | 0.03 | 1.41 | 0.03 | 0    | 1.35 |
| steviol:19:O-beta:D:glucoside                              | 152758       | PR | PR     | 0.02 | 0.06 | 1.56 | 0.03 | 0.07 | 1.51 |
| Gibberellin A36                                            | 443455       | PR | PR     | 0.02 | 0.14 | 1.55 | 0.01 | 0.05 | 1.67 |
| HexCer 16:1;2O/3:0                                         | 164376142    | SP | HexCer | 0.02 | 0.21 | 1.5  | 0.01 | 0.1  | 1.62 |
| N:decanoyl histidine                                       | 22804201     | FA | FA     | 0.02 | 0.02 | 1.59 | 0.02 | 0.04 | 1.52 |



|                                                                                                         |              |    |         |      |      |      |      |      |      |
|---------------------------------------------------------------------------------------------------------|--------------|----|---------|------|------|------|------|------|------|
| HexCer 20:1;2O/44:12                                                                                    | 164213461    | SP | HexCer  | 0.02 | 0.01 | 1.62 | 0.02 | 0.02 | 1.52 |
| AHexCer (O-26                                                                                           |              | SP | AHexCer | 0.02 | 0    | 1.57 | 0.02 | 0.01 | 1.46 |
| DG O-22:1_14:1                                                                                          | 164467845    | GL | DG      | 0.02 | 0.01 | 1.63 | 0.02 | 0.01 | 1.53 |
| DGTS 18:0_15:1                                                                                          | 138307779    | GL | DGTS    | 0.03 | 0    | 1.54 | 0.03 | 0.01 | 1.43 |
| ST 28:1;O2                                                                                              | 52931372     | ST | ST      | 0.05 | 0    | 1.4  | 0.05 | 0    | 1.29 |
| LDGTS 17:2                                                                                              | 138183223    | GL | LDGTS   | 0.02 | 0.04 | 1.58 | 0.02 | 0.06 | 1.5  |
| HexCer 14:2;2O/8:0                                                                                      | 164265491    | SP | HexCer  | 0.01 | 0.11 | 1.84 | 0.03 | 0.22 | 1.6  |
| PEtOH 16:0_26:4                                                                                         | 138244092    | GP | PEtOH   | 0.04 | 0    | 1.49 | 0.04 | 0.02 | 1.38 |
| SL 24:0;O/25:0;O                                                                                        | 164377055    | SL | SL      | 0.01 | 0.03 | 1.69 | 0.01 | 0.01 | 1.64 |
| 2:deoxy:20:hydroxyecdysone<br>22:phosphate                                                              | 21122088     | ST | ST      | 0.02 | 0.04 | 1.6  | 0.02 | 0.03 | 1.56 |
| SL 18:3;O/26:5                                                                                          | 164281705    | SL | SL      | 0.04 | 0.07 | 1.47 | 0.05 | 0.1  | 1.4  |
| PC 16:0_24:6                                                                                            | 164408413    | GP | PC      | 0.03 | 0.03 | 1.55 | 0.03 | 0.04 | 1.47 |
| LNAPE 13:1/N:22:6                                                                                       | 165224529    | GP | LNAPE   | 0.03 | 0    | 1.5  | 0.04 | 0.08 | 1.33 |
| 1:hexadecanyl:2:((2': $\alpha$ :gluco-<br>syl): $\beta$ :glucosyl):3: $\beta$ :xylo-<br>syl:sn:glycerol | LMGL04010001 | GL | GL      | 0.04 | 0.01 | 1.43 | 0.05 | 0.05 | 1.3  |
| BMP 7:0_20:1                                                                                            | 138127284    | GP | BMP     | 0.02 | 0.01 | 1.6  | 0.02 | 0    | 1.53 |
